# Supplementary material
Source: ML conference proceedings conference paper supplement (https://openreview.net/forum?id=XdmUohdMCX)
Supplement: supplementary_material [file attachment]

## A APPENDIX

### A.1 LLM USAGE

In preparing this manuscript, we used a large language model (LLM) to help polish phrasing and grammar.

### A.2 IMPLEMENTATION DETAILS

#### A.2.1 OVERALL OPTIMIZATION OBJECTIVE

As discussed in the main paper, our training objective comprises detection losses for individual elements and reasoning losses for their relationships. Following prior methods [Li et al. \(2023a\)](#); [Wu et al. \(2023\)](#); [Zhu et al. \(2020\)](#), traffic element detection is supervised using a combination of classification loss ( $\lambda_1 = 2$ ), L1 loss ( $\lambda_2 = 5$ ), and IoU loss ( $\lambda_3 = 2$ ). Lane detection is similarly optimized with classification and regression losses. The regression component includes L1 loss on control points and a chamfer distance loss  $L_{\text{BézierCD}}$  computed on sampled on-curve points, introduced in our curve-guided cross-attention. We set the number of sampled points  $K$  to 11. The corresponding weights are  $\lambda_4 = 1.5$  for classification,  $\lambda_5 = 0.05$  for L1 loss, and  $\lambda_6 = 0.02$  for the chamfer distance loss. For topology reasoning, we adopt a focal loss for classification, as in prior work, and introduce a contrastive loss  $\mathcal{L}_{\text{con}}$  to further enhance relational learning. Each contrastive pair includes one positive and three negative samples. The focal and contrastive losses are weighted by  $\lambda_7 = 5$  and  $\lambda_8 = 0.1$ , respectively. The overall loss function is defined as:

$$\mathcal{L}_{\text{all}} = \mathcal{L}_{\text{det}} + \mathcal{L}_{\text{relation}}, \quad (11)$$

$$\mathcal{L}_{\text{det}} = \mathcal{L}_{\text{reg}}^{\text{te}} + \mathcal{L}_{\text{reg}}^{\text{lane}} \quad (12)$$

$$= (\lambda_1 \mathcal{L}_{\text{class}}^{\text{te}} + \lambda_2 \mathcal{L}_{\text{L1}}^{\text{te}} + \lambda_3 \mathcal{L}_{\text{IoU}}^{\text{te}}) + (\lambda_4 \mathcal{L}_{\text{class}}^{\text{lane}} + \lambda_5 \mathcal{L}_{\text{L1}}^{\text{lane}} + \lambda_6 \mathcal{L}_{\text{BézierCD}}), \quad (13)$$

$$\mathcal{L}_{\text{relation}} = \lambda_7 \mathcal{L}_{\text{class}}^{\text{topo}} + \lambda_8 \mathcal{L}_{\text{con}}. \quad (14)$$

#### A.2.2 ILLUSTRATION OF TOPOLOGY REASONING

To better illustrate the computation flow of topology prediction, we provide an algorithm for the L2L prediction pipeline (see Algorithm [1](#)). The L2T head follows a similar structure, differing mainly in the way of building the pairwise embeddings  $\mathbf{G}_{(\cdot)}$ , which can refer to the main paper Sec. [3.3.2](#).

---

#### Algorithm 1 Geometry-Enhanced L2L Reasoning

---

**Require:** Lane query features  $\mathbf{Q}_{\text{lane}} \in \mathbb{R}^{N \times C}$ , lane endpoints  $\mathbf{P}_{\text{lane}} \in \mathbb{R}^{N \times 2 \times 2}$

**Ensure:** Connectivity logits  $\mathbf{T}_{\text{L2L}} \in \mathbb{R}^{N \times N \times 1}$

- 1:  $\mathbf{E}_{\text{pre}} \leftarrow \text{MLP}_1(\mathbf{Q}_{\text{lane}})$   $\triangleright \in \mathbb{R}^{N \times \frac{C}{2}}$
  - 2:  $\mathbf{E}_{\text{suc}} \leftarrow \text{MLP}_2(\mathbf{Q}_{\text{lane}})$   $\triangleright \in \mathbb{R}^{N \times \frac{C}{2}}$
  - 3:  $(\mathbf{PE}_{\text{pre}}, \mathbf{PE}_{\text{suc}}) \leftarrow \text{PosEnc}(P_{\text{lane}})$   $\triangleright$  sinusoidal positional encoding
  - 4:  $\tilde{\mathbf{E}}_{\text{pre}} \leftarrow \mathbf{E}_{\text{pre}} + \mathbf{PE}_{\text{pre}}$
  - 5:  $\tilde{\mathbf{E}}_{\text{suc}} \leftarrow \mathbf{E}_{\text{suc}} + \mathbf{PE}_{\text{suc}}$
  - 6:  $\mathbf{G}_{\text{L2L}} \leftarrow \text{BroadcastConcat}(\tilde{\mathbf{E}}_{\text{pre}}, \tilde{\mathbf{E}}_{\text{suc}})$   $\triangleright$  pairwise feature,  $\in \mathbb{R}^{N \times N \times C}$
  - 7:  $\text{Dist}_{ij} \leftarrow \text{distance}(P_i^e - P_j^s)$   $\triangleright$  distance: lane  $i$  end point  $\rightarrow$  lane  $j$  start point,  $\in \mathbb{R}^{N \times N \times 1}$
  - 8:  $\text{DistEmbed} \leftarrow \text{MLP}(\text{Dist}_{ij})$   $\triangleright \in \mathbb{R}^{N \times N \times C}$
  - 9:  $\mathbf{T}_{\text{L2L}} \leftarrow \text{MLP}(\mathbf{G}_{\text{L2L}} + \text{DistEmbed})$   $\triangleright \in \mathbb{R}^{N \times N \times 1}$
- return**  $\mathbf{T}_{\text{L2L}}$
-

### 810 A.3 EXTRA EXPERIMENTS

#### 811 A.3.1 MORE ANALYSIS ON GEOMETRY TOPOLOGY.

812 TopoLogic [Fu et al. \(2024\)](#) proposes a geometric distance topology (GDT), which shares certain  
813 similarities with our Geometry-Biased Self-Attention and Geometry-Enhanced L2L Topology, but  
814 *differs fundamentally in design and effectiveness.*

815 Table 4: **Experiments on Geometric Distance Topology (GDT).** “Topologic – GDT<sub>L2L</sub>”: Inference  
816 without GDT<sub>L2L</sub>. TopoLogic<sup>†</sup>: Inference using the hyperparameters learned during their lane  
817 representation training. “Ours + GDT<sub>lane</sub>”: Replaces our geometry encoding with TopoLogic’s  
818 GDT for lane representation learning. “Ours + GDT<sub>L2L</sub>”: Ensembles our L2L predictions with GDT,  
819 same as TopoLogic.

| 820 Model                          | 821 DET <sub>l</sub> | 822 DET <sub>t</sub> | 823 TOP <sub>ll</sub> | 824 TOP <sub>lt</sub> | 825 OLS     |
|------------------------------------|----------------------|----------------------|-----------------------|-----------------------|-------------|
| 826 Topologic                      | 29.9                 | 47.2                 | 23.9                  | 25.4                  | 44.1        |
| 827 Topologic – GDT <sub>L2L</sub> | 29.9                 | 47.2                 | 11.6                  | 25.4                  | 40.4        |
| 828 Topologic <sup>†</sup>         | 29.9                 | 47.2                 | 23.2                  | 25.4                  | 43.9        |
| 829 Ours                           | <b>33.8</b>          | <b>50.9</b>          | <b>29.2</b>           | <b>32.2</b>           | <b>48.9</b> |
| 830 Ours + GDT <sub>lane</sub>     | 32.8                 | 50.0                 | 28.4                  | 30.8                  | 47.9        |
| 831 Ours + GDT <sub>L2L</sub>      | 33.8                 | 50.9                 | 28.7                  | 32.2                  | 48.7        |

832 **Lane Representation Learning.** GDT [Fu et al. \(2024\)](#) focuses exclusively on connectivity estimation  
833 by computing the end-to-start point distance between lanes and updating representations using an  
834 additional GCN block. *In contrast*, our method captures richer spatial cues beyond connectivity,  
835 such as inter-lane distances and angular relations. These geometric priors—*e.g.*, parallelism, per-  
836 pendicularity, and merging—are common in real-world road layouts and intuitively leveraged by  
837 humans. We explicitly encode the shortest endpoint distance and angular difference between lanes  
838 into high-dimensional relational features, which are further projected as biases in self-attention to  
839 enhance both perception and downstream topology reasoning.

840 **L2L Topology Reasoning.** Our method enhances geometric reasoning by leveraging the fact that  
841 annotated connected lanes share overlapping endpoints. We encode these end-to-start distances  
842 as high-dimensional embeddings and integrate them directly into the L2L relation features during  
843 training, enabling the model to learn from geometric cues in an end-to-end manner. In contrast,  
844 TopoLogic [Fu et al. \(2024\)](#) computes a scalar topology score for each lane pair (ranging from 0 to  
845 1) based on their GDT, and applies this score to adjust L2L predictions (GDT<sub>L2L</sub>) **only** at inference  
846 time. This post-hoc refinement is not incorporated in learning and relies on manually assigned  
847 hyperparameters, which may not generalize well across different scenarios. As shown in Tab. 4, this  
848 design limits model performance and degrades robustness, further highlighting the advantage of our  
849 approach.

850 To better understand the above discussed differences, we conduct three comparative experiments  
851 summarized in Tab. 4, and analyze the results below.

852 **Exp. 1: GDT vs. Geometry-Biased Self-Attention.** To compare GDT with our proposed geometry-  
853 biased self-attention, we replace our geometry encoding with TopoLogic’s end-to-start point distance  
854 to construct self-attention bias for lane representation learning. As shown in Tab. 4, this modification  
855 leads to noticeable performance degradation in lane detection: DET<sub>l</sub> drops by 1.0 (Ours vs. Ours +  
856 GDT<sub>lane</sub>), TOP<sub>ll</sub> decreases by 0.8, and TOP<sub>lt</sub> falls by 1.4. These results suggest that TopoLogic’s GDT  
857 is insufficient for capturing the rich inter-lane spatial relationships essential for effective topology  
858 reasoning, reaffirming the advantage of our proposed relation embedding.

859 **Exp. 2: Evaluating GDT in L2L Topology Reasoning.** Unlike our (geometry-enhanced L2L  
860 topology) method, which integrates geometric cues directly into the L2L relation embedding during  
861 training, TopoLogic treats GDT as an auxiliary component applied at inference time to adjust L2L  
862 predictions. This approach relies on several hyperparameters to balance the influence between GDT  
863 and model-based predictions. Although these weights are optimized during training as part of lane  
864 representation learning, they are not used during L2L inference—manual values are assigned instead.

To examine the effect of GDT on topology learning, we evaluate TopoLogic’s official model under two configurations: 1). TopoLogic<sup>†</sup>: which uses the hyperparameters learned during training; 2) TopoLogic – GDT<sub>L2L</sub>: which removes GDT from the L2L topology inference process. As shown in Tab. 4, both configurations lead to significant performance degradation, with a severe drop in L2L topology accuracy when GDT is removed during L2L inference (TopoLogic vs. TopoLogic – GDT<sub>L2L</sub>). This suggests that TopoLogic’s lane features alone do not sufficiently encode relational information for effective topology reasoning. The reliance on post-hoc adjustments and manual tuning limits the robustness and generalizability of the method.

**Exp 3: Applying GDT to Our L2L Inference.** We further investigate the generalizability of GDT by incorporating it into our model’s L2L inference, following TopoLogic’s ensembling strategy. Specifically, we fuse our L2L predictions with GDT outputs using their predefined hyperparameters, without modifying our trained model. As shown in Tab. 4, this ensembling leads to a decrease in TOP<sub>ll</sub> by 0.5 (Ours + GDT<sub>L2L</sub> vs. Ours). This outcome highlights the limited transferability of TopoLogic’s formulation. In contrast, our model achieves strong L2L performance without requiring additional tuning or post-processing, demonstrating that our relation embedding offers a more effective and learnable approach to modeling geometric topology.

Table 5: Comparison with different bézier representation.

| Lane Rep.    | DET <sub>l</sub> | DET <sub>t</sub> | TOP <sub>ll</sub> | TOP <sub>lt</sub> | OLS         |
|--------------|------------------|------------------|-------------------|-------------------|-------------|
| BeMapNet     | 29.9             | 50.0             | 25.9              | 28.9              | 46.2        |
| BézierFormer | 31.0             | 49.7             | 26.1              | 29.6              | 46.5        |
| Ours         | <b>33.8</b>      | <b>50.9</b>      | <b>29.2</b>       | <b>32.2</b>       | <b>48.9</b> |

### A.3.2 COMPARISON OF BÉZIER REPRESENTATION.

We compare our Bézier-based lane representation with other alternative formulations in Tab. 5. BézierFormer uses `grid_sample` to sample features and separately predicts offsets and attention weights for each point within deformable attention, which increases computational overhead and compromises instance-level consistency in lane prediction. In contrast, our method predicts offsets and attention weights jointly for the entire lane instance using a single lane query, resulting in improved efficiency and coherence. BeMapNet employs a piecewise Bézier representation by dynamically predicting the number of segments, which increases model complexity and uncertainty. In the task of lane topology reasoning, such dynamic segmentation does not yield performance gains and lacks the structural regularity that our fixed Bézier formulation provides.

### A.3.3 LIMITATIONS AND FUTURE WORK

Through qualitative analysis on test scenes, we identify recurring patterns where topology reasoning is more error-prone. These failure cases highlight opportunities for future enhancements:

- **Small traffic elements.** Tiny signs or lights at long range often appear with low pixel resolution in front-view images, making their detection and subsequent association to lanes difficult.
- **Distant lanes.** Some lanes far away project to only a few pixels in front-view, undermining their detectability and relational cue strength.
- **Occluded or partially visible lanes.** In dense urban scenes, lanes may be partially blocked or overlapped by other objects, confusing relational inference.

These challenging cases point toward future directions: incorporating **temporal continuity** (e.g., across frames), leveraging motion cues or sequential context, and fusing richer spatiotemporal relational information may help improve robustness in such difficult scenes.

### A.3.4 QUALITATIVE RESULTS

We present additional qualitative results in Fig. 5 and Fig. 6. Leveraging our proposed components, RelTopo demonstrates superior perception of lane centerlines compared to previous methods, as shown in the second row of the figures. Moreover, RelTopo achieves more accurate lane-to-lane (L2L)

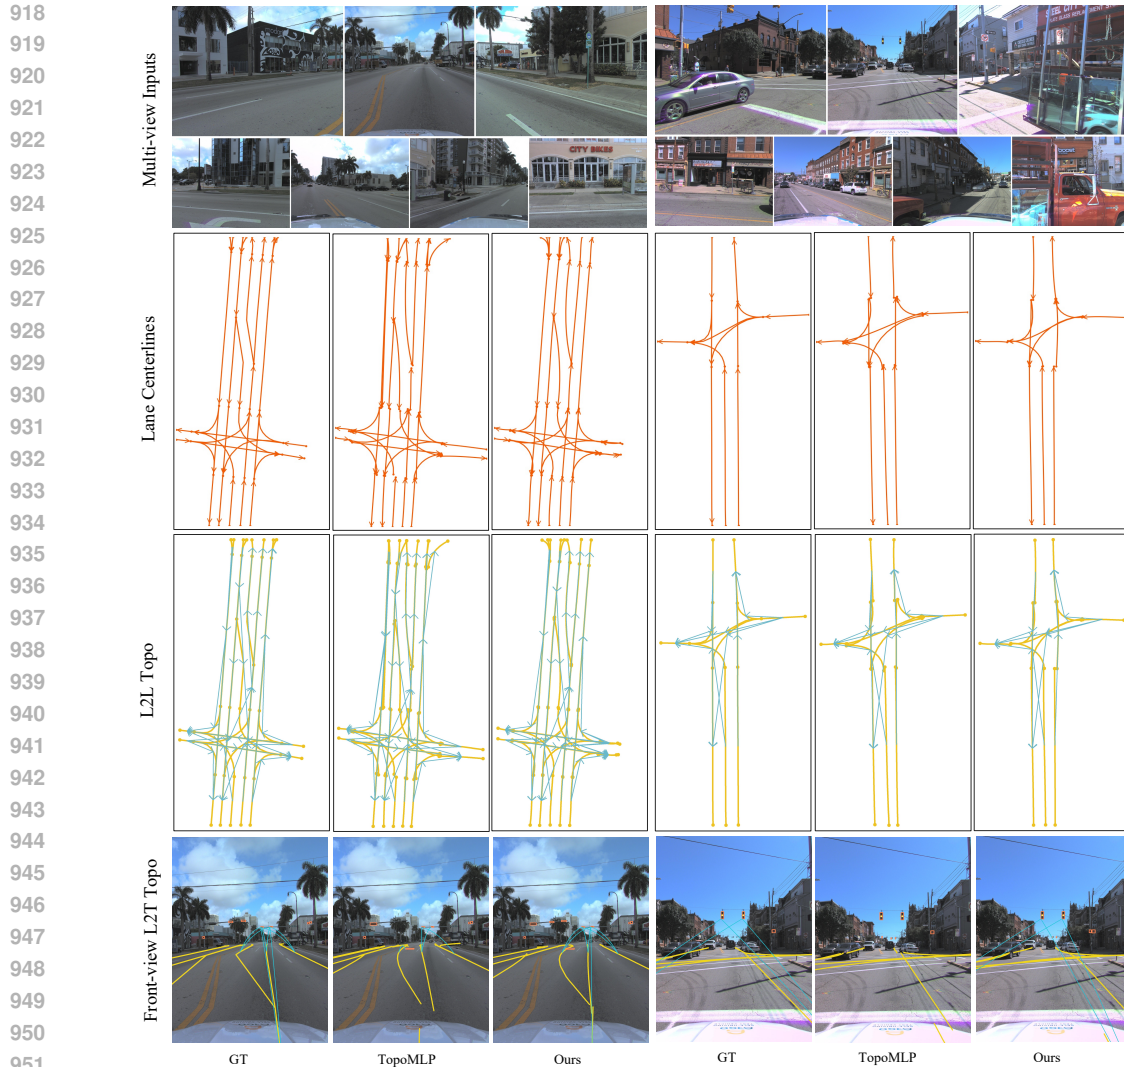

952  
953  
954  
955  
956  
957  
958  
959  
960

Figure 5: Qualitative results comparison. The 1<sup>st</sup> row presents the multi-view input images, the 2<sup>nd</sup> row shows the predicted lane centerline results, and the 3<sup>rd</sup> row illustrates the predicted L2L topology results, with light blue arrowlines indicating directed connectivity between lanes. The final row depicts the front-view L2T topology predictions, where orange boxes highlight detected traffic elements (e.g., traffic lights and signs), mbevlane lines denote projected lanes, and blue lines in FV represent the pairing relationships between traffic elements and lanes. Each result row consists of three columns: the left column shows ground truth, the center column shows results from TopoMLP, and the right column presents our results. Two data samples are illustrated in this figure.

961  
962  
963  
964

and lane-to-traffic-element (L2T) topology reasoning, as illustrated in the last two rows. Notably, RelTopo exhibits significantly improved L2T topology reasoning performance in complex scenarios involving intricate L2T relationships.

### 965 A.3.5 ON $DET_t$ VARIATION

966  
967  
968  
969  
970  
971

In our ablation studies, interestingly, we observed variations in  $DET_t$  When modifying modules while keeping the traffic element decoder structure fixed. This phenomenon, also present in prior work but seldom discussed, deserves further analysis. We interpret this behavior as *inter-task interference*, a well-documented phenomenon in multi-task learning (MTL). In our experiments, introducing stronger geometric and relational biases can shift shared feature representations, which may transiently affect traffic element detection.

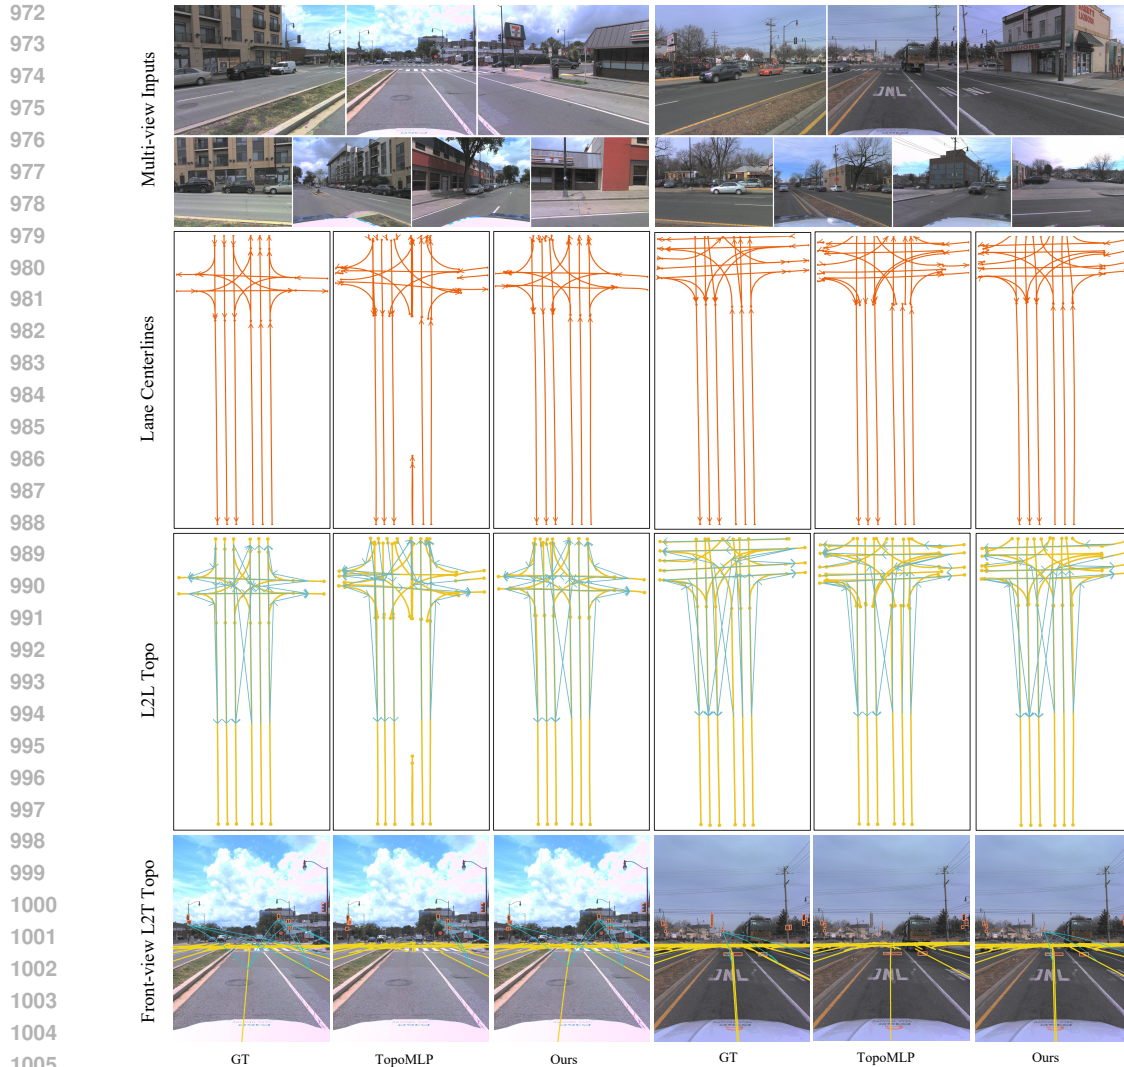

Figure 6: More qualitative result comparison. With our proposed designs, RelTopo achieves more accurate predictions for lane centerlines, as well as L2L and L2T topology reasoning.

Consistent with this interpretation, prior works report similar variation ranges: TopoMLP Wu et al. (2023) shows  $DET_t$  values spanning 48.5–50.9 (Tab.5 in their paper), while TopoLogic Fu et al. (2024) reports 44.1–47.2 across different settings (Tab.3–4 in their paper). Despite these variations in ablations, our final model consistently improves across all metrics, including  $DET_t$  (e.g., comparing #R1 baseline vs. #R6 + relational perception and reasoning, and #R1 vs. #R7 + all designs in Tab. 2). This indicates that our multi-level relational modeling ultimately yields a net benefit across tasks.

While addressing cross-task interference is not the primary focus of this work, we recognize it as an important avenue for future research. Potential strategies such as gradient balancing may further stabilize performance.

### A.3.6 GENERALIZATION TO STRONGER ENCODERS

We designed RelTopo to be encoder-agnostic and complementary to visual backbones: the relational modules sit on top of feature extraction and do not depend on a particular encoder. To assess the generalizability and scalability of our design, we conduct additional experiments using a stronger backbone, including ResNet-101 and Swin-Base Liu et al. (2021b).

1026 As shown in Tab. 6, our relational modules consistently provide significant improvements regardless of backbone strength. For the default ResNet-50, adding our modules increases OLS from 44.5 to 48.9. For ResNet-101, OLS improves from 45.2 to 49.4. Even with Swin-Base, we see a jump from 47.5 to 51.1. These results clearly demonstrate that RelTopo is not tied to a specific encoder; instead, it can enhance performance across architectures.

Table 6: Results with different backbones (without vs with our designs).

| Encoder    | + Our designs | OLS  |
|------------|---------------|------|
| ResNet-50  | ×             | 44.5 |
| ResNet-50  | ✓             | 48.9 |
| ResNet-101 | ×             | 45.2 |
| ResNet-101 | ✓             | 49.4 |
| Swin-Base  | ×             | 47.5 |
| Swin-Base  | ✓             | 51.1 |

1035  
1036  
1037  
1038  
1039  
1040  
1041  
1042  
1043  
1044  
1045  
1046  
1047  
1048  
1049  
1050  
1051  
1052  
1053  
1054  
1055  
1056  
1057  
1058  
1059  
1060  
1061  
1062  
1063  
1064  
1065  
1066  
1067  
1068  
1069  
1070  
1071  
1072  
1073  
1074  
1075  
1076  
1077  
1078  
1079
